# Supplementary material for: Current Role of Immunotherapy in Gastric, Esophageal and Gastro-Esophageal Junction Cancers—A Report from the Western Canadian Gastrointestinal Cancer Consensus Conference
Source: MDPI journal article supplement (doi:10.3390/curroncol29050257), 2022-04-29
Supplement: s1 [file s1]

**Table S1.** Western Canadian Gastrointestinal Cancer Conference webinar's participants list.

| <b>Name</b>           | <b>Disciplines</b>         | <b>Job Title</b>                   | <b>Province</b> |
|-----------------------|----------------------------|------------------------------------|-----------------|
| Adnan Zaidi           | Medical Oncology           | Saskatchewan Cancer Agency         | SK              |
| Amina Taleb           | Medical Oncology           | Arnie Charbonneau Cancer Institute | AB              |
| Anahita Dehmoobed     | Pharmacy                   | Cancer Care Manitoba               | MB              |
| Bryan Brunet          | Radiation Oncology         | Saskatchewan Cancer Agency         | SK              |
| Chen Zhou             | Pathology and Lab Medicine | BC Cancer Agency                   | BC              |
| Christina Kim         | Medical Oncology           | CancerCare Manitoba                | MB              |
| Corinne Doll          | Radiation Oncology         | Arnie Charbonneau Cancer Institute | AB              |
| Duc Le                | Radiation Oncology         | Saskatchewan Cancer Agency         | SK              |
| Devin Schellenberg    | Radiation Oncology         | BC Cancer Agency                   | BC              |
| Elvira Planincic      | Nursing                    | Cancer Care Manitoba               | MB              |
| Emina Torlakovic      | Pathology and Lab Medicine | University of Saskatchewan         | SK              |
| Henrike Rees          | Pathology and Lab Medicine | Saskatchewan Health Authority      | SK              |
| Jacob Easaw           | Medical Oncology           | Cross Cancer Institute             | AB              |
| James Paul            | Medical Oncology           | CancerCare Manitoba                | MB              |
| Janine Davies         | Medical Oncology           | BC Cancer Agency                   | BC              |
| Jiti Gill             | Medical Oncology           | BC Cancer Agency                   | BC              |
| Kamal Haider          | Medical Oncology           | Saskatchewan Cancer Agency         | SK              |
| Karen King            | Medical Oncology           | Cross Cancer Institute             | AB              |
| Karen Mulder          | Medical Oncology           | Cross Cancer Institute             | AB              |
| Keith Tankel          | Radiation Oncology         | Cross Cancer Institute             | AB              |
| Kelly Cheung          | Pharmacy                   | CancerCare Manitoba                | MB              |
| Kimberly Hagel        | Medical Oncology           | Saskatchewan Cancer Agency         | SK              |
| Lori Walker           | Nursing                    | Cancer Care Manitoba               | MB              |
| Louise Quenneville    | Pathology and Lab Medicine | Saskatchewan Health Authority      | SK              |
| Maria Augusta Safo    | Medical Oncology           | BC Cancer Agency                   | BC              |
| Mark Kristjanson      | Community Oncology         | CancerCare Manitoba                | MB              |
| Michael Lee           | Medical Oncology           | Peter MacCallum Cancer Centre      | AUS             |
| Mussawar Iqbal        | Medical Oncology           | Saskatchewan Cancer Agency         | SK              |
| Omar Abdelsalam       | Medical Oncology           | Cross Cancer Institute             | AB              |
| Osama Ahmed           | Medical Oncology           | Saskatchewan Cancer Agency         | SK              |
| Rani Kanthan          | Pathology and Lab Medicine | University of Saskatchewan         | SK              |
| Rebekah Rittberg      | Medical Oncology           | CancerCare Manitoba                | MB              |
| Sangjune Laurence Lee | Radiation Oncology         | Arnie Charbonneau Cancer Institute | AB              |
| Shahid Ahmed          | Medical Oncology           | Saskatchewan Cancer Agency         | SK              |
| Sharlene Gill         | Medical Oncology           | BC Cancer Agency                   | BC              |
| Shaun Loewen          | Radiation Oncology         | Arnie Charbonneau Cancer Institute | AB              |
| Sheryl Koski          | Medical Oncology           | Cross Cancer Institute             | AB              |
| Simon Yu              | Medical Oncology           | Burnaby Hospital Cancer Centre     | BC              |
| Stephanie Lelond      | Nursing                    | CancerCare Manitoba                | MB              |
| Tehmina Asif          | Medical Oncology           | BC Cancer Agency                   | BC              |
| Thuan Do              | Medical Oncology           | BC Cancer Agency - Surrey          | BC              |
| Tirath Nijjar         | Radiation Oncology         | Cross Cancer Institute             | AB              |
| Vallerie Gordon       | Medical Oncology           | CancerCare Manitoba                | MB              |
| Vincent Tam           | Medical Oncology           | Arnie Charbonneau Cancer Institute | AB              |
| Wei Ning Jiang        | Radiation Oncology         | BC Cancer Agency                   | BC              |
| Wei Xiong             | Pathology and Lab Medicine | University of British Columbia     | BC              |

|                |                            |                                                      |    |
|----------------|----------------------------|------------------------------------------------------|----|
| William Hunter | Radiation Oncology         | CancerCare Manitoba                                  | MB |
| Deepti Ravi    | Pathology and Lab Medicine | Saskatchewan Health Authority                        | SK |
| Howard Lim     | Medical Oncology           | BC Cancer Agency                                     | BC |
| Teresa Tiano   | Chair & Co-Founder         | My Gut Feeling - Stomach Cancer Foundation of Canada | ON |
